# Supplementary material for: Brain Activity in Adolescent Major Depressive Disorder Before and After Fluoxetine Treatment
Source: Atypon-hosted journal article supplement (doi:10.1176/appi.ajp.2011.11040615), 2012-01-23
Supplement: appi.ajp.2011.11040615.ds001.pdf [file appi.ajp.2011.11040615.ds001.pdf]

**TABLE S1. Activations at Amygdala, Orbitofrontal Cortex (OFC), and Subgenual Anterior Cingulate Cortex (sgACC)**

| Region               | Contrast <sup>a</sup> | Voxels | Side                                | t or F      | z             | p (Uncorrected) | p (FDR corrected) | MNI coordinates<br>(x, y, z) |              |            |
|----------------------|-----------------------|--------|-------------------------------------|-------------|---------------|-----------------|-------------------|------------------------------|--------------|------------|
| Amygdala             | T1 MDD > HC           | 36     | R                                   | 3.65        | 3.36          | 0.000           | 0.030             | 33, -6, -12                  |              |            |
|                      |                       |        |                                     | 2.32        | 2.23          | 0.013           | 0.066             | 19, 3, -16                   |              |            |
|                      | Group by time         | 16     | L                                   | 3.17        | 2.97          | 0.002           | 0.030             | -22, 0, -12                  |              |            |
|                      |                       |        |                                     | 9.77        | 2.78          | 0.003           | 0.172             | 30, -8, -12                  |              |            |
|                      |                       |        |                                     | 7.08        | 2.33          | 0.010           | 0.172             | -19, -3, -16                 |              |            |
|                      | MDD T1 > T2           | 16     | L                                   | 4.24        | 3.35          | 0.000           | 0.058             | -19, -6, -16                 |              |            |
|                      | HC T2 > T1            | 26     | R                                   | 2.66        | 2.58          | 0.005           | 0.196             | 30, -6, -16                  |              |            |
| Orbitofrontal cortex | T1 MDD > HC           | 102    | R                                   | 3.51        | 3.25          | 0.001           | 0.157             | 41, 19, -16                  |              |            |
|                      |                       |        |                                     | 2.77        | 2.63          | 0.004           | 0.157             | 36, 30, -16                  |              |            |
|                      |                       |        |                                     | 2.77        | 2.62          | 0.006           | 0.157             | 36, 33, -4                   |              |            |
|                      |                       |        |                                     | 3.19        | 2.98          | 0.001           | 0.157             | -16, 47, -16                 |              |            |
|                      |                       |        |                                     | 3.13        | 2.94          | 0.002           | 0.157             | -3, 47, -8                   |              |            |
|                      |                       |        |                                     | 3.07        | 2.89          | 0.002           | 0.157             | -8, 38, -12                  |              |            |
|                      | 41                    | L      | 2.78                                | 2.64        | 0.004         | 0.157           | -41, 30, -8       |                              |              |            |
|                      |                       |        | 2.49                                | 2.38        | 0.009         | 0.157           | -36, 16, -16      |                              |              |            |
|                      |                       |        | 2.23                                | 2.15        | 0.016         | 0.157           | -44, 22, -12      |                              |              |            |
|                      |                       |        | 2.62                                | 2.49        | 0.006         | 0.157           | -22, 38, -20      |                              |              |            |
|                      | 19                    | L      | 2.23                                | 2.15        | 0.016         | 0.157           | -25, 28, -12      |                              |              |            |
|                      |                       |        | 1.88                                | 1.83        | 0.033         | 0.157           | -28, 28, -24      |                              |              |            |
|                      |                       |        | 2.42                                | 2.32        | 0.010         | 0.157           | -19, 14, -16      |                              |              |            |
|                      |                       |        | 2.87                                | 2.68        | 0.004         | 0.546           | -16, 52, -12      |                              |              |            |
|                      | T2 MDD > HC           | 26     | L                                   | 1.78        | 1.73          | 0.042           | 0.546             | -8, 55, -4                   |              |            |
|                      |                       |        |                                     | 2.83        | 2.64          | 0.004           | 0.546             | -30, 22, -12                 |              |            |
|                      |                       |        |                                     | 2.23        | 2.13          | 0.017           | 0.546             | -25, 36, -8                  |              |            |
|                      | MDD T1 > T2           | 18     | L                                   | 2.73        | 2.55          | 0.005           | 0.955             | -44, 28, -8                  |              |            |
|                      | HC T1 > T2            | 50     | L                                   | 2.30        | 2.19          | 0.014           | 0.956             | 28, 28, -16                  |              |            |
|                      |                       |        |                                     | 2.78        | 2.61          | 0.005           | 0.642             | -41, 41, -4                  |              |            |
| 2.62                 | 2.48                  | 0.007  | 0.642                               | -28, 33, -8 |               |                 |                   |                              |              |            |
|                      |                       |        |                                     |             | 1.97          | 1.90            | 0.029             | 0.643                        | -36, 41, -16 |            |
|                      |                       |        |                                     |             | 2.92          | 2.73            | 0.003             | 0.642                        | 28, 36, -8   |            |
|                      |                       |        |                                     |             | 2.89          | 2.70            | 0.003             | 0.991                        | 14, 16, -20  |            |
| HC T2 > T1           | 15                    | R      | 1.99                                | 1.92        | 0.027         | 0.991           | 22, 16, -16       |                              |              |            |
|                      |                       |        | Subgenual anterior cingulate cortex | T1 MDD > HC | 27            | L               | 3.24              | 3.50                         | 0.001        | 0.043      |
| 2.22                 | 2.31                  | 0.013  |                                     |             |               |                 | 0.107             | -8, 6, -20                   |              |            |
| 39                   | R                     | 3.15   |                                     |             |               |                 | 3.39              | 0.001                        | 0.043        | 8, 8, -12  |
|                      |                       | 2.44   |                                     |             |               |                 | 2.55              | 0.007                        | 0.093        | 11, 8, -20 |
| 2.23                 | 2.32                  | 0.013  | 0.107                               | 11, 25, -12 |               |                 |                   |                              |              |            |
|                      |                       |        |                                     |             | Group by time | 11              | L                 | 2.63                         | 8.82         | 0.004      |
| R                    | 2.72                  | 9.40   | 0.003                               | 0.260       |               |                 |                   | 6, 6, -8                     |              |            |
| MDD T1 > T2          | 10                    | R      | 2.36                                | 2.50        | 0.009         | 0.603           | 6, 8, -12         |                              |              |            |

<sup>a</sup> T1=baseline; T2=week 8; MDD=depressed adolescents; HC=healthy comparison subjects.

**TABLE S2. Group-by-Time Post Hoc Simple Group Effects for Amygdala, Orbitofrontal Cortex, and Subgenual Anterior Cingulate Activations<sup>a</sup>**

| Time Period & Group                 | Left   |       |                  |       |        |      | Right  |       |                  |       |        |      |
|-------------------------------------|--------|-------|------------------|-------|--------|------|--------|-------|------------------|-------|--------|------|
|                                     | M      | SE    | 95% CI for M     | F     | p      | d    | M      | SE    | 95% CI for M     | F     | p      | d    |
| Amygdala                            |        |       |                  |       |        |      |        |       |                  |       |        |      |
| Baseline                            |        |       |                  | 5.76  | 0.04   | 0.76 |        |       |                  | 9.31  | 0.008  | 0.96 |
| MDD (n=19)                          | 0.091  | 0.049 | -0.007 to 0.191  |       |        |      | 0.050  | 0.038 | -0.028 to 0.128  |       |        |      |
| Control (n=21)                      | -0.071 | 0.046 | -0.165 to 0.023  |       |        |      | -0.113 | 0.036 | -0.188 to -0.038 |       |        |      |
| Week 8                              |        |       |                  | 2.51  | 0.12   | 0.57 |        |       |                  | 0.33  | 0.56   | 0.20 |
| MDD (n=15) <sup>b</sup>             | -0.108 | 0.051 | -0.213 to -0.003 |       |        |      | -0.031 | 0.042 | -0.118 to 0.056  |       |        |      |
| Control (n=17) <sup>b</sup>         | 0.007  | 0.047 | -0.090 to 0.105  |       |        |      | 0.004  | 0.039 | -0.077 to 0.086  |       |        |      |
| Orbital Frontal Cortex              |        |       |                  |       |        |      |        |       |                  |       |        |      |
| Baseline                            |        |       |                  | 17.86 | 0.0002 | 1.33 |        |       |                  | 19.04 | 0.0002 | 1.38 |
| MDD (n=19)                          | 0.042  | 0.023 | -0.005 to 0.089  |       |        |      | 0.051  | 0.022 | 0.005 to 0.097   |       |        |      |
| Control (n=21)                      | -0.093 | 0.022 | -0.138 to -0.049 |       |        |      | -0.085 | 0.021 | -0.129 to -0.041 |       |        |      |
| Week 8                              |        |       |                  | 1.41  | 0.24   | 0.42 |        |       |                  | 0.01  | 0.97   | 0.04 |
| MDD (n=15) <sup>b</sup>             | 0.010  | 0.027 | -0.045 to 0.067  |       |        |      | -0.018 | 0.021 | -0.061 to 0.025  |       |        |      |
| Control (n=17) <sup>b</sup>         | -0.037 | 0.025 | -0.090 to 0.015  |       |        |      | -0.019 | 0.020 | -0.059 to 0.021  |       |        |      |
| Subgenual Anterior Cingulate Cortex |        |       |                  |       |        |      |        |       |                  |       |        |      |
| Baseline                            |        |       |                  | 10.10 | 0.006  | 1.01 |        |       |                  | 13.73 | 0.001  | 1.17 |
| MDD (n=19)                          | 0.009  | 0.025 | -0.043 to 0.061  |       |        |      | 0.020  | 0.025 | 0.030 to 0.072   |       |        |      |
| Control (n=21)                      | -0.103 | 0.024 | -0.153 to -0.054 |       |        |      | -0.109 | 0.024 | -0.158 to -0.060 |       |        |      |
| Week 8                              |        |       |                  | 0.01  | 0.98   | 0.03 |        |       |                  | 2.26  | 0.14   | 0.53 |
| MDD (n=15) <sup>b</sup>             | -0.011 | 0.024 | -0.061 to 0.038  |       |        |      | -0.052 | 0.027 | -0.108 to 0.003  |       |        |      |
| Control (n=17) <sup>b</sup>         | -0.012 | 0.022 | -0.058 to 0.034  |       |        |      | 0.006  | 0.025 | -0.045 to 0.058  |       |        |      |

<sup>a</sup> M=least squares mean; SE=standard error; 95% CI=95% confidence interval for the expected mean value. The F statistic was used to test for mean differences between the two groups; p values were adjusted for multiple testing within each region using the false discovery rate; n=sample size per group. Cohen's d is to effect size estimator from modeled least squares means and pooled variance and represents the standardized effect size for the between-subjects group effect (major depression versus healthy comparison group).

<sup>b</sup> Least squares means at week 8 were adjusted for baseline activation.
